# Supplementary material for: Carboxylate-promoted reductive functionalization of CO2 with amines and hydrosilanes under mild conditions
Source: Royal Society of Chemistry journal article supplement (doi:10.1039/c7gc00484b), 2017-01-01

## Supporting Information

### **Carboxylate-promoted reductive functionalization of CO<sub>2</sub> with amine and hydrosilane under mild conditions**

Xiao-Fang Liu<sup>a</sup>, Chang Qiao<sup>a</sup>, Xiao-Ya Li<sup>a</sup>, Liang-Nian He<sup>\*a,b</sup>

<sup>a</sup> State Key Laboratory and Institute of Elemento-Organic Chemistry, Nankai University

<sup>b</sup> Collaborative Innovation Center of Chemical Science and Engineering, Nankai University, Tianjin 300071, China. E-mail: heln@nankai.edu.cn; Tel.: (+86) 22-23503878; fax: (+86) 22-23503878.

## Table of Contents

|                                                                                                                                                         |    |
|---------------------------------------------------------------------------------------------------------------------------------------------------------|----|
| 1. General Experimental Section .....                                                                                                                   | S2 |
| 2. Cesium Formate-Catalyzed Hydrosilation of CO <sub>2</sub> in the Absence of Amines .....                                                             | S3 |
| 3. Experimental procedure for reductive functionalization of CO <sub>2</sub> with aniline to <i>N</i> -methylaniline and <i>N,N</i> -methylaniline..... | S4 |
| 4. Characterization Data for the Products and Amino Intermediate.....                                                                                   | S5 |
| 5. NMR Spectral Copies of the Products and Amino Intermediate.....                                                                                      | S9 |

## 1. General Experimental Section

The starting materials were commercially available and were used without further purification except solvents. The products were isolated by column chromatography on silica gel (200-300 mesh) using petroleum ether (60-90 °C) and ethyl acetate. All compounds were characterized by  $^1\text{H}$  NMR,  $^{13}\text{C}$  NMR and mass spectroscopy, which are consistent with those reported in the literature. NMR spectra were determined on Bruker 400 in  $\text{CDCl}_3$  or  $\text{C}_6\text{D}_6$ .  $^1\text{H}$  NMR spectra was recorded on 400 MHz spectrometers using  $\text{CDCl}_3$  as solvent referenced to tetramethylsilane (TMS, 0 ppm). The  $^{13}\text{C}$  NMR chemical shifts were reported in ppm relative to the carbon resonance of  $\text{CDCl}_3$  (central peak is 77.0 ppm).  $^1\text{H}$  NMR peaks are labeled as singlet (s), doublet (d), triplet (t), and multiplet (m). The coupling constants,  $J$ , are reported in Hertz (Hz). GC-MS data were performed on Finnigan HP G1800 A. GC analyses were performed on a Shimadzu GC-2014 equipped with a capillary column (RTX-17 30 m  $\times$  0.25  $\mu\text{m}$ ) using a flame ionization detector.

## 2. Cesium formate-catalyzed hydrosilation of CO<sub>2</sub> in the absence of amines

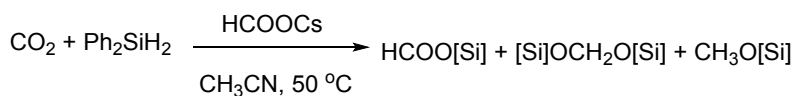

Under inert atmosphere (Ar), a 10 mL Schlenk flask was charged with cesium formate (2.3 mg), diphenylsilane (186  $\mu\text{L}$ , 1 mmol) and CH<sub>3</sub>CN (2 mL) successfully. The reaction mixture was stirred at 50  $^\circ\text{C}$  under an atmosphere of CO<sub>2</sub> (99.999%, balloon). Samples were taken for the desired time (6 h) to be analyzed through <sup>1</sup>H NMR. It was found that diphenylsilane (4.90 ppm) was consumed in 6 h, giving rise to peaks at  $\sim$  8.1,  $\sim$  5.5 and  $\sim$  3.5 ppm, indicative of CO<sub>2</sub> reduction to silyl formates, silyl acetals and silyl methoxides.<sup>1</sup>

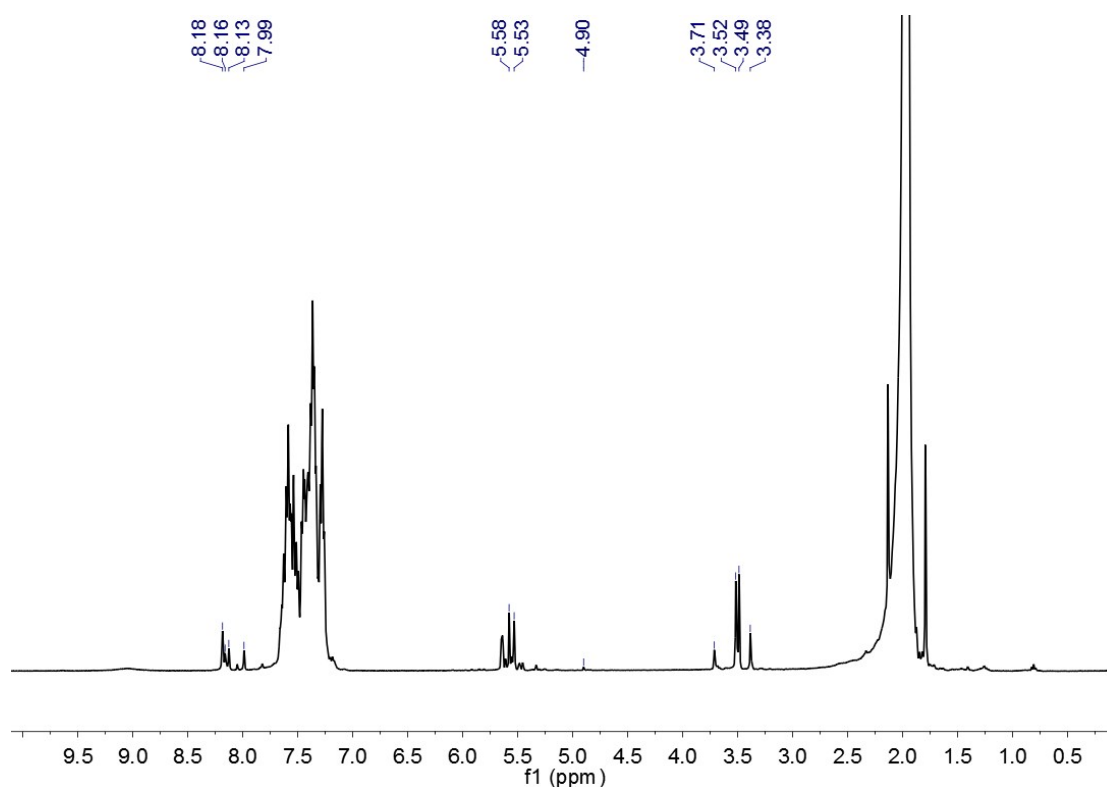

1. (a) S. N. Riduan, Y. Zhang and J. Y. Ying, *Angew. Chem. Int. Ed.*, 2009, **48**, 3322-3325. (b) M.-A. Courtemanche, M.-A. Legare, E. Rochette and F.-G. Fontaine, *Chem. Commun.*, 2015, **51**, 6858-6861.

### 3. Experimental procedure for reductive functionalization of CO<sub>2</sub> with aniline to *N*-methylaniline and *N,N*-methylaniline

Under inert atmosphere (Ar), a 50 mL Schlenk flask was charged successively with cesium formate (9.2 mg, 5 mol% relative to amine), aniline (1 mmol), diphenylsilane (744  $\mu$ L, 4 mmol) and CH<sub>3</sub>CN (8 mL). The reaction mixture was stirred at 50 °C for 6 h under an atmosphere of CO<sub>2</sub> (99.999%, balloon). After the reaction, the reaction mixture was concentrated and purified by silica gel column chromatography (petroleum ether-EtOAc). *N*-methylaniline was obtained with 21% isolated yield, and *N,N*-methylaniline were with 28% yield. The spectrum of *N*-methylaniline are as below: <sup>1</sup>H NMR (400 MHz, CDCl<sub>3</sub>)  $\delta$  7.18 (t, *J* = 7.8 Hz, 2H), 6.70 (t, *J* = 7.3 Hz, 1H), 6.60 (d, *J* = 8.2 Hz, 2H), 3.63 (s, 1H), 2.81 (s, 3H). <sup>13</sup>C NMR (101 MHz, CDCl<sub>3</sub>)  $\delta$  149.25, 129.14, 117.18, 112.36, 30.66.

#### 4. Characterization Data for the Products

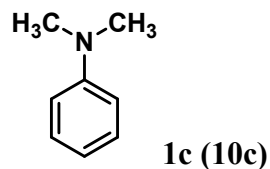

##### *N,N*-Dimethylaniline

Yellow oil.  $^1\text{H}$  NMR (400 MHz,  $\text{CDCl}_3$ ,  $25^\circ\text{C}$ , TMS)  $\delta$  7.24 (dd,  $J = 8.8, 7.3$  Hz, 2H), 6.85 – 6.62 (m, 3H), 2.94 (s, 6H).  $^{13}\text{C}$  NMR (101 MHz,  $\text{CDCl}_3$ ,  $25^\circ\text{C}$ , TMS)  $\delta$  150.58, 129.03, 116.60, 112.62, 40.61. GC-MS (EI, 70 eV)  $m/z$  (%) 121.15 (81.29), 120.15 (100.00), 77.05 (29.56).

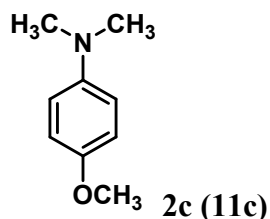

##### 4-Methoxy-*N,N*-dimethylaniline

White solid.  $^1\text{H}$  NMR (400 MHz,  $\text{CDCl}_3$ ,  $25^\circ\text{C}$ , TMS)  $\delta$  6.88 – 6.81 (m, 2H), 6.79 – 6.72 (m, 2H), 3.76 (s, 3H), 2.86 (s, 6H).  $^{13}\text{C}$  NMR (101 MHz,  $\text{CDCl}_3$ ,  $25^\circ\text{C}$ , TMS)  $\delta$  152.12, 145.52, 115.04, 114.60, 55.72, 41.92. GC-MS (EI, 70 eV)  $m/z$  (%) 151.25 (59.49), 136.20 (100.00).

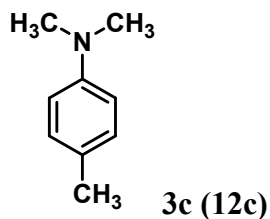

##### *N,N*-Dimethyl-*p*-toluidine

Yellow oil.  $^1\text{H}$  NMR (400 MHz,  $\text{CDCl}_3$ ,  $25^\circ\text{C}$ , TMS)  $\delta$  7.05 (d,  $J = 8.1$  Hz, 2H), 6.69 (d,  $J = 8.2$  Hz, 2H), 2.89 (s, 6H), 2.25 (s, 3H).  $^{13}\text{C}$  NMR (101 MHz,  $\text{CDCl}_3$ ,  $25^\circ\text{C}$ ,

TMS)  $\delta$  148.77, 129.54, 126.09, 113.19, 41.05, 20.22. GC-MS (EI, 70 eV)  $m/z$  (%) 35.20 (77.14), 134.15 (100.00), 91.10 (22.96).

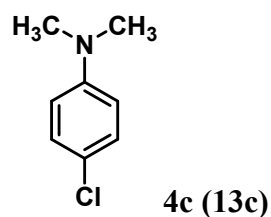

***4-Chloro-N,N-dimethylaniline***

Yellow oil.  $^1\text{H}$  NMR (400 MHz,  $\text{CDCl}_3$ , 25°C, TMS)  $\delta$  7.17 (d,  $J = 8.9$  Hz, 2H), 6.64 (d,  $J = 8.7$  Hz, 2H), 2.92 (s, 6H).  $^{13}\text{C}$  NMR (101 MHz,  $\text{CDCl}_3$ , 25°C, TMS)  $\delta$  149.10, 128.75, 121.36, 113.59, 40.64. GC-MS (EI, 70 eV)  $m/z$  (%) 157.10 (25.27), 156.10 (39.00), 155.10 (82.99), 154.10 (100.00).

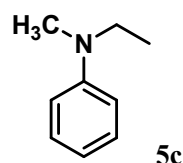

Yellow liquid  $^1\text{H}$  NMR (400 MHz,  $\text{CDCl}_3$ )  $\delta$  7.22 (t,  $J = 7.7$  Hz, 2H), 6.84 – 6.52 (m, 3H), 3.39 (q,  $J = 7.0$  Hz, 2H), 2.89 (s, 3H), 1.10 (t,  $J = 7.1$  Hz, 3H).  $^{13}\text{C}$  NMR (101 MHz,  $\text{CDCl}_3$ )  $\delta$  149.05, 129.11, 115.97, 112.33, 46.75, 37.38, 11.13.

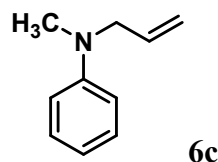

***N-allyl-N-methylaniline***

Yellow oil.  $^1\text{H}$  NMR (400 MHz,  $\text{CDCl}_3$ , 25°C, TMS)  $\delta$  7.25 – 7.20 (m, 2H), 6.74 – 6.68 (m, 3H), 5.89 – 5.80 (m, 1H), 5.18 – 5.13 (m, 2H), 3.92 (d,  $J = 4.9$  Hz, 2H), 2.93 (s, 3H).  $^{13}\text{C}$  NMR (101 MHz,  $\text{CDCl}_3$ , 25°C, TMS)  $\delta$  149.43, 133.75, 129.07, 116.36, 116.12, 112.40, 55.23, 37.97. HRMS (ESI,  $m/z$ ) calcd. For  $\text{C}_{10}\text{H}_{13}\text{N}$   $[\text{M}+\text{H}]^+$ : 148.1126, found: 148.1122.

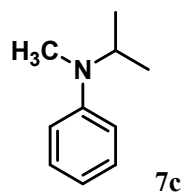

***N-isopropyl-N-methylaniline***

Yellow liquid.  $^1\text{H}$  NMR (400 MHz,  $\text{CDCl}_3$ )  $\delta$  7.22 (t,  $J = 7.9$  Hz, 2H), 6.79 (d,  $J = 8.2$  Hz, 2H), 6.69 (t,  $J = 7.2$  Hz, 1H), 4.18 – 3.96 (m, 1H), 2.72 (s, 3H), 1.15 (d,  $J = 6.6$  Hz, 6H).  $^{13}\text{C}$  NMR (101 MHz,  $\text{CDCl}_3$ )  $\delta$  150.10, 129.07, 116.38, 113.28, 48.87, 29.75, 19.26.

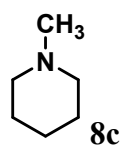

***1-Methylpiperidine***

Colourless oil.  $^1\text{H}$  NMR (400 MHz,  $\text{CDCl}_3$ , 25°C, TMS)  $\delta$  2.33 (s, 4H), 2.24 (s, 3H), 1.68 – 1.51 (m, 4H), 1.41 (s, 2H).  $^{13}\text{C}$  NMR (101 MHz,  $\text{CDCl}_3$ , 25°C, TMS)  $\delta$  56.46, 46.86, 25.95, 23.70. GC-MS (EI, 70 eV)  $m/z$  (%) 99.15 (42.36), 98.15 (100.00), 71.10 (22.54).

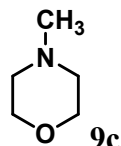

***4-methylmorpholine***

Colourless oil.  $^1\text{H}$  NMR (400 MHz,  $\text{CDCl}_3$ , 25°C, TMS)  $\delta$  3.80 – 3.61 (m, 4H), 2.41 (s, 4H), 2.29 (s, 3H).  $^{13}\text{C}$  NMR (101 MHz,  $\text{CDCl}_3$ , 25°C, TMS)  $\delta$  66.67, 55.20, 46.23. GC-MS (EI, 70 eV)  $m/z$  (%) 101.15 (100.00), 100.15 (36.36), 71.10 (60.10).

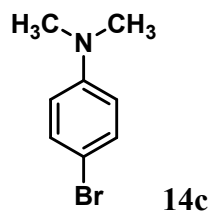

***4-Bromo-N,N-dimethylaniline***



White solid.  $^1\text{H}$  NMR (400 MHz,  $\text{CDCl}_3$ ,  $25^\circ\text{C}$ , TMS)  $\delta$  7.30 (d,  $J = 9.1$  Hz, 2H), 6.59 (d,  $J = 8.8$  Hz, 2H), 2.92 (s, 6H).  $^{13}\text{C}$  NMR (101 MHz,  $\text{CDCl}_3$ ,  $25^\circ\text{C}$ , TMS)  $\delta$  56.46, 46.86, 25.95, 23.70.  $^{13}\text{C}$  NMR (101 MHz,  $\text{CDCl}_3$ )  $\delta$  149.46, 131.64, 114.06, 108.45, 40.53. GC-MS (EI, 70 eV)  $m/z$  (%) 201.00 (93.41), 200.00 (100.00), 199.00 (99.32), 198.00 (97.76), 118.15 (45.22), 77.10 (20.98).

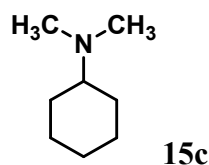

*N,N*-dimethylcyclohexanamine

Colourless oil.  $^1\text{H}$  NMR (400 MHz,  $\text{CDCl}_3$ ,  $25^\circ\text{C}$ , TMS)  $\delta$  2.27 (s, 6H), 2.14 – 2.10 (m, 1H), 1.86 – 1.76 (m, 4H), 1.68 – 1.55 (m, 1H), 1.26 – 1.09 (m, 5H).  $^{13}\text{C}$  NMR (101 MHz,  $\text{CDCl}_3$ ,  $25^\circ\text{C}$ , TMS)  $\delta$  63.60, 41.43, 28.82, 26.14, 25.60. GC-MS (EI, 70 eV) 127.20 (26.01), 84.15 (100.00), 71.10 (21.41).

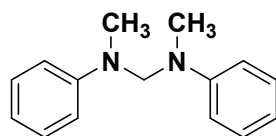

*N,N'*-dimethyl-*N,N'*-diphenylmethanedi-amine

Colourless liquid.  $^1\text{H}$  NMR (400 MHz,  $\text{CDCl}_3$ )  $\delta$  7.25 (dd,  $J = 8.6, 7.4$  Hz, 4H), 6.84 (d,  $J = 8.1$  Hz, 4H), 6.78 (t,  $J = 7.3$  Hz, 2H), 4.76 (s, 2H), 2.87 (s, 6H).  $^{13}\text{C}$  NMR (101 MHz,  $\text{CDCl}_3$ )  $\delta$  149.31, 129.27, 117.86, 113.76, 70.44, 36.31. GC-MS (EI, 70 eV)  $m/z$  (%) 226.20 (2.83), 121.15 (16.02), 120.15 (100.00), 107.15 (61.88), 106.15 (71.81), 79.10 (21.17), 77.10 (39.67).

#### 4. NMR Spectral Copies of the Products

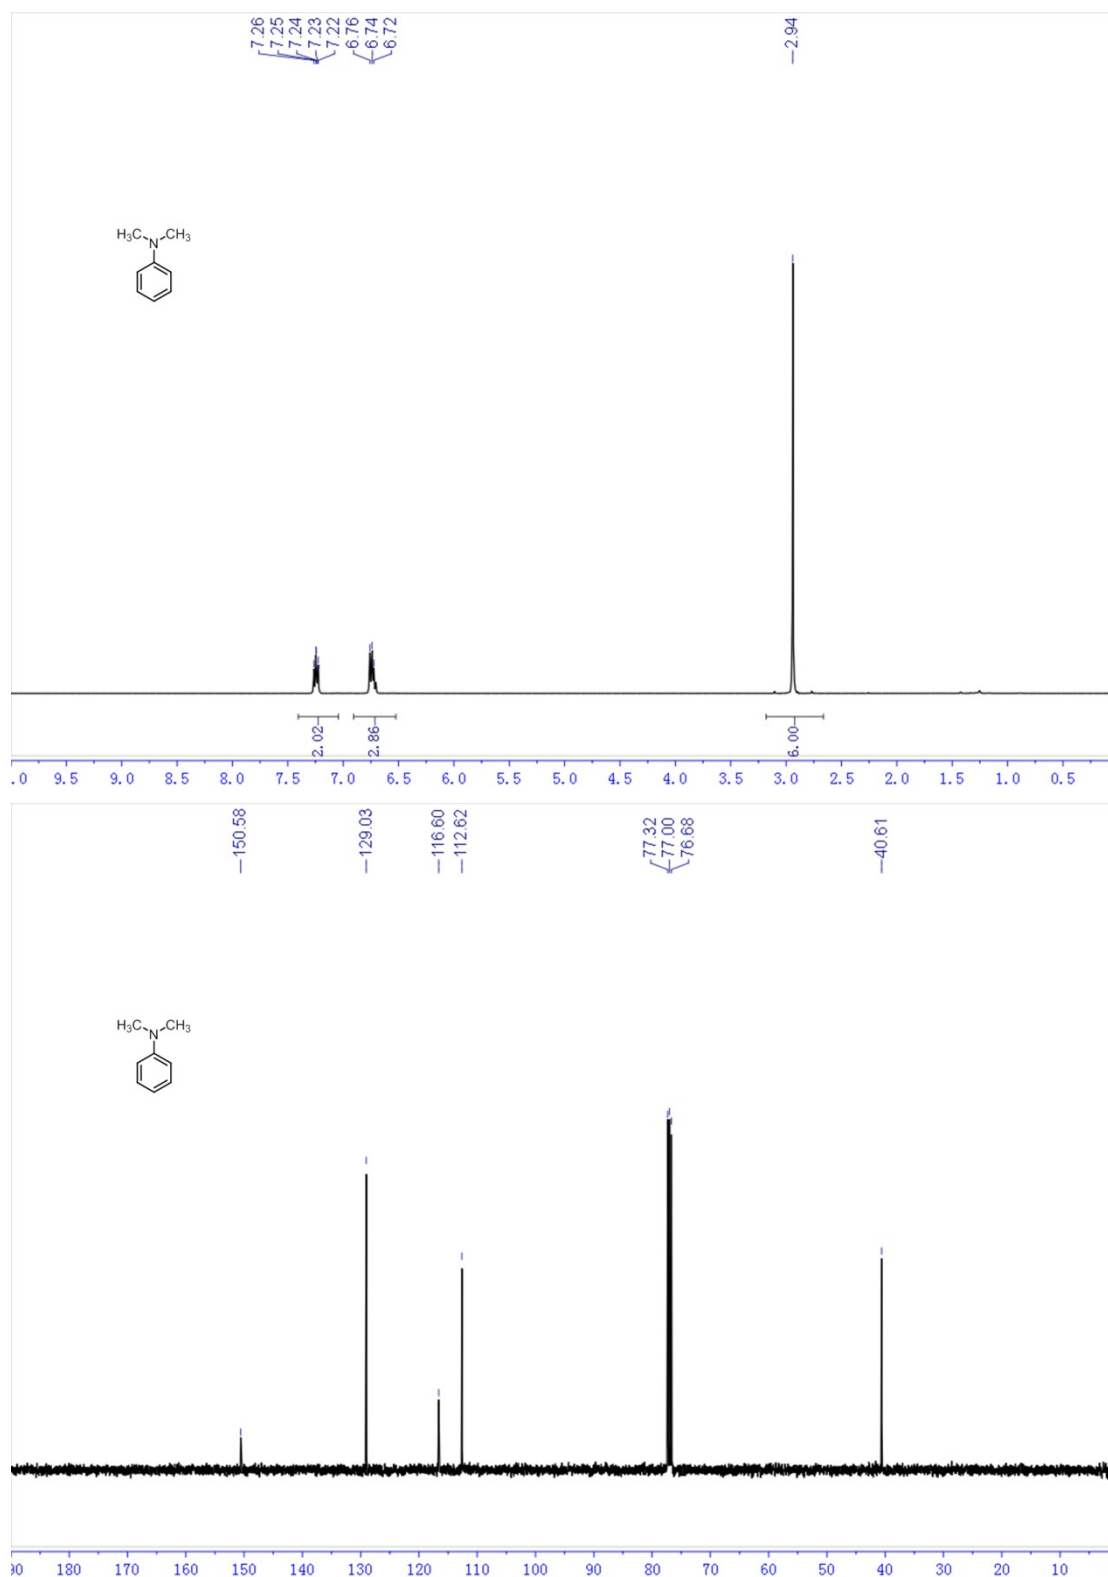

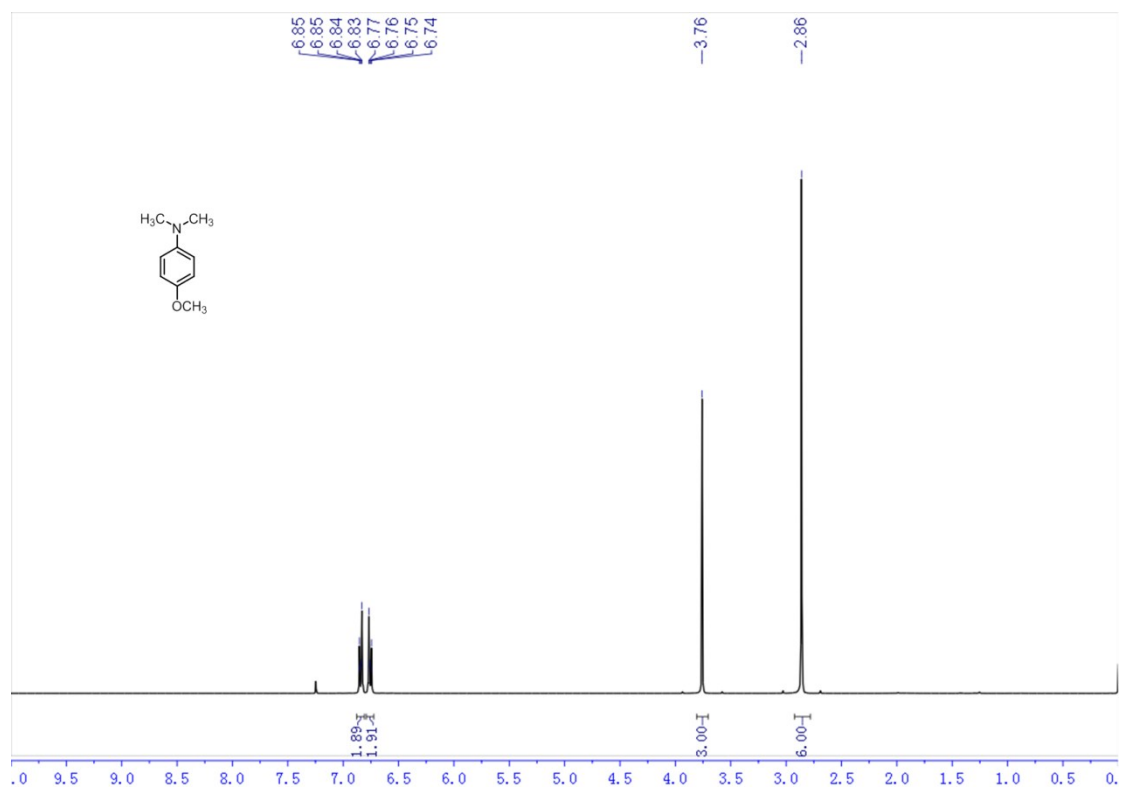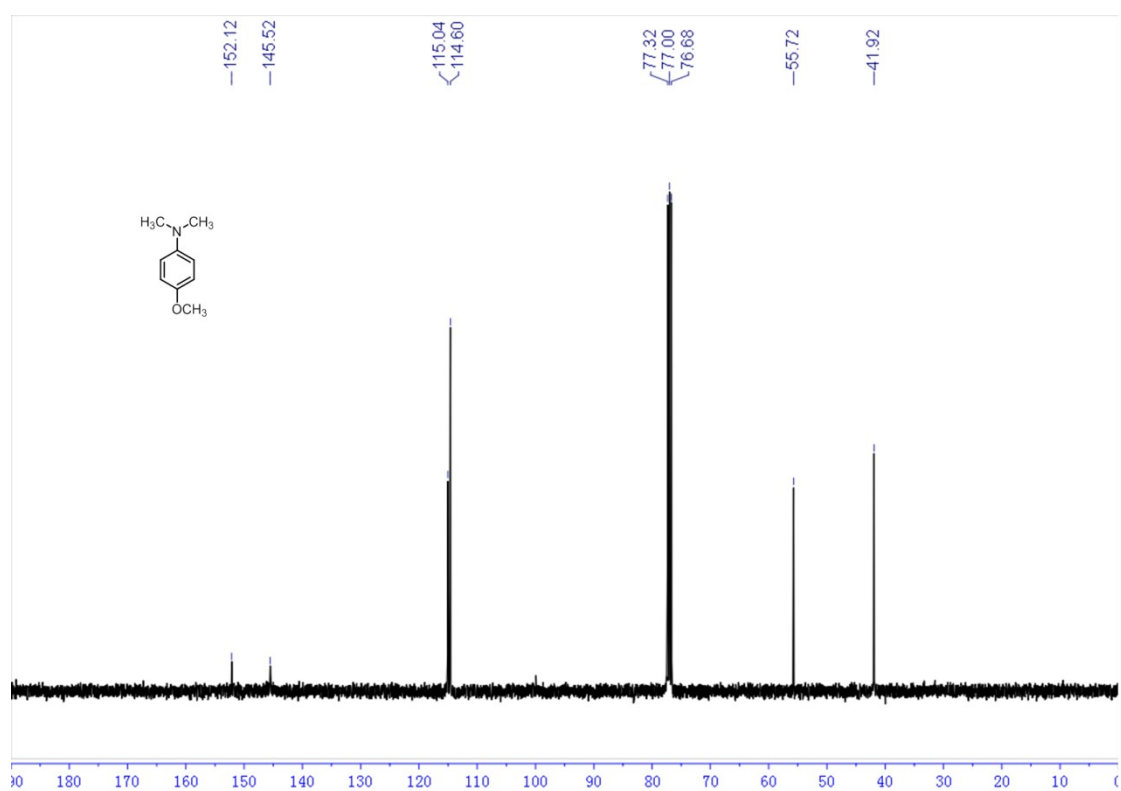

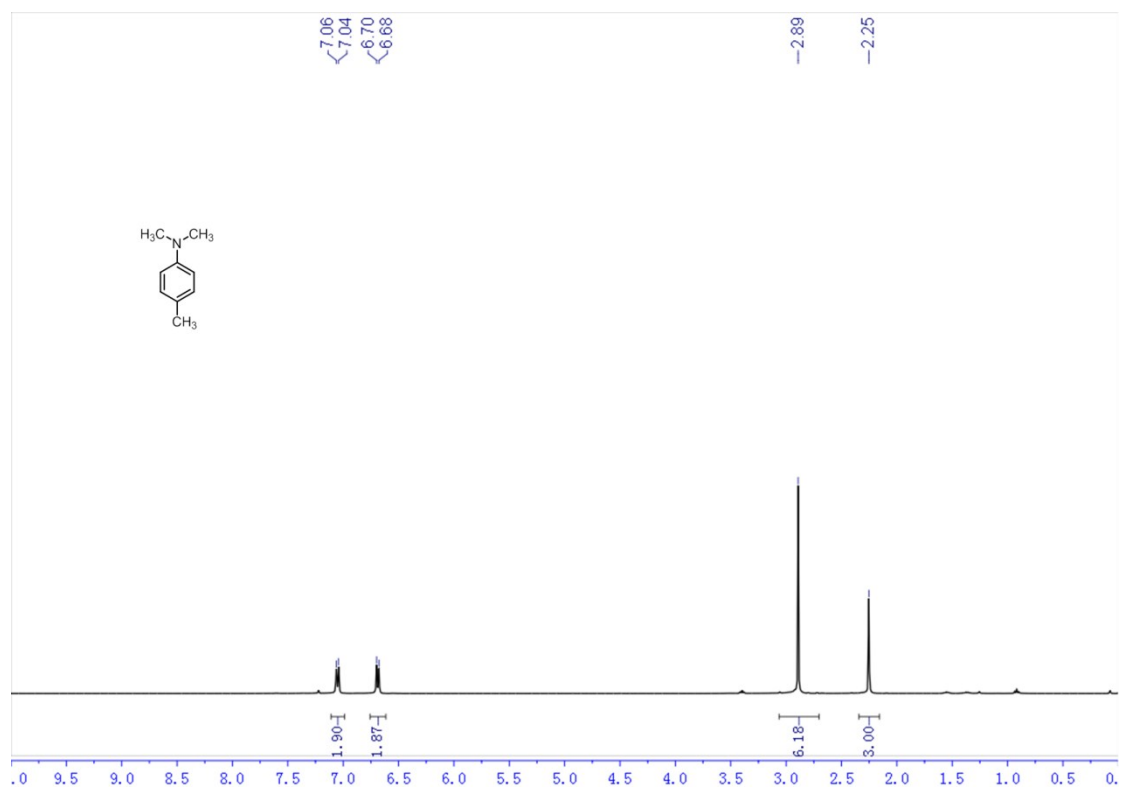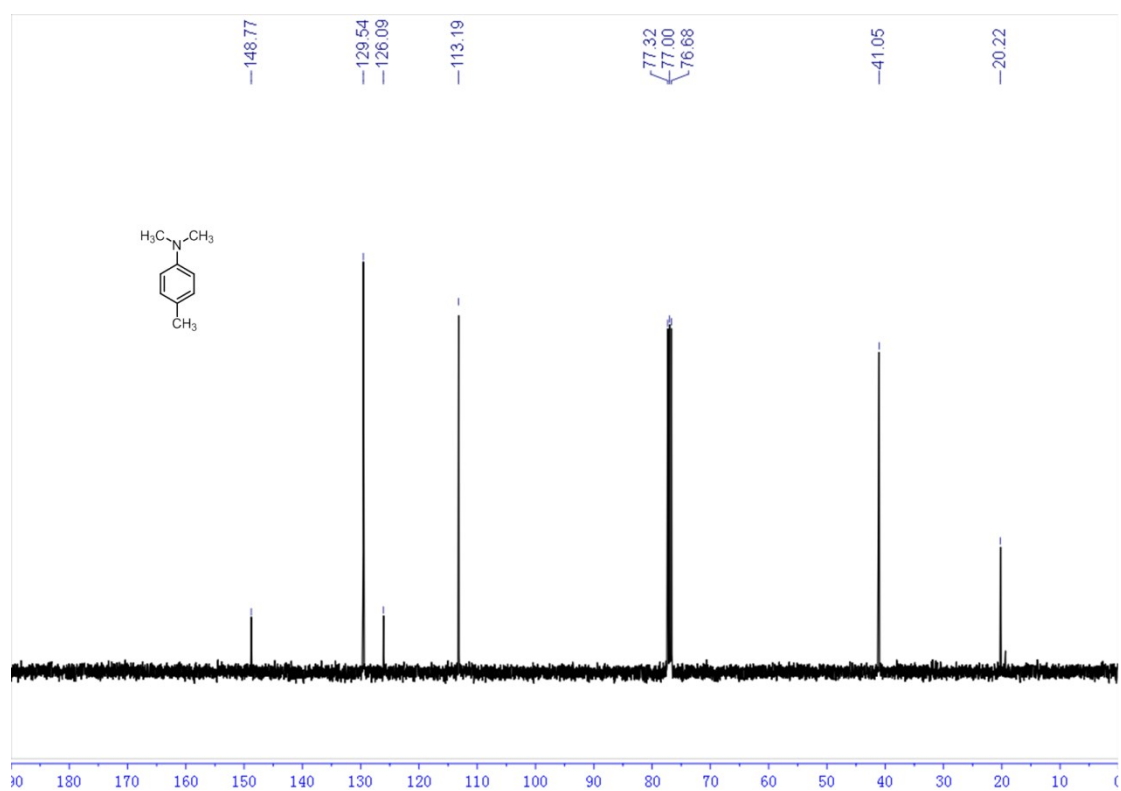

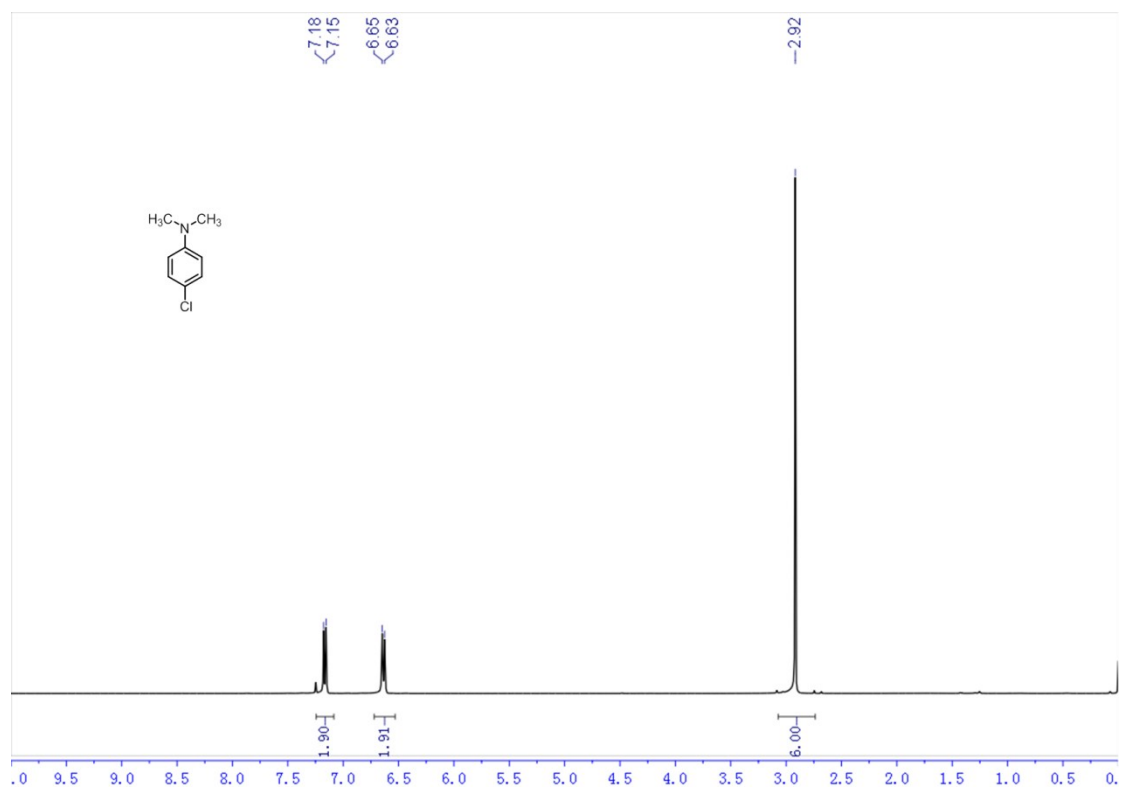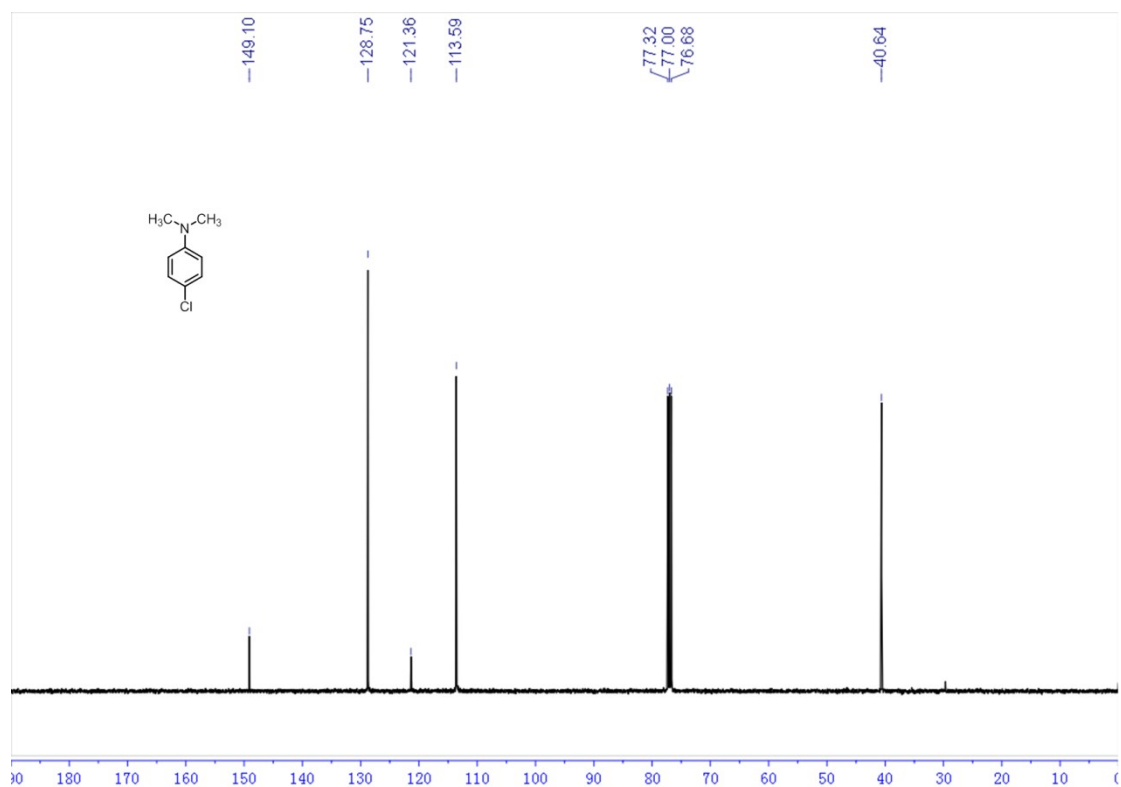

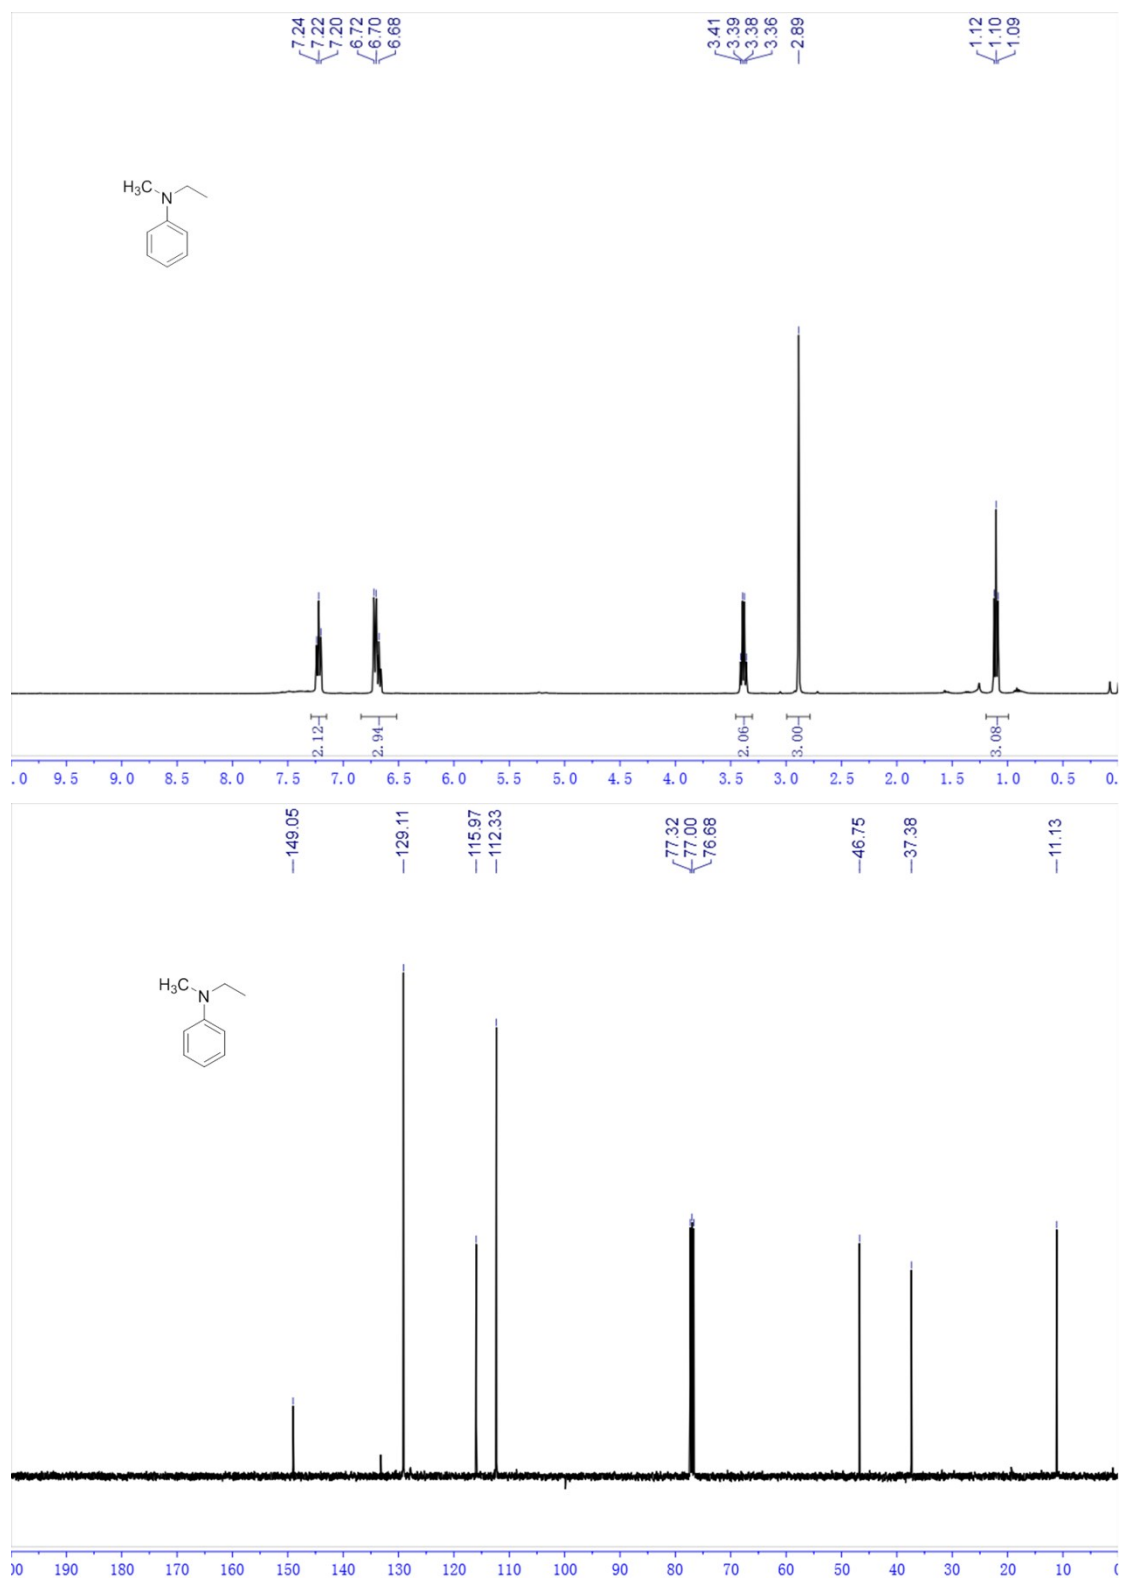

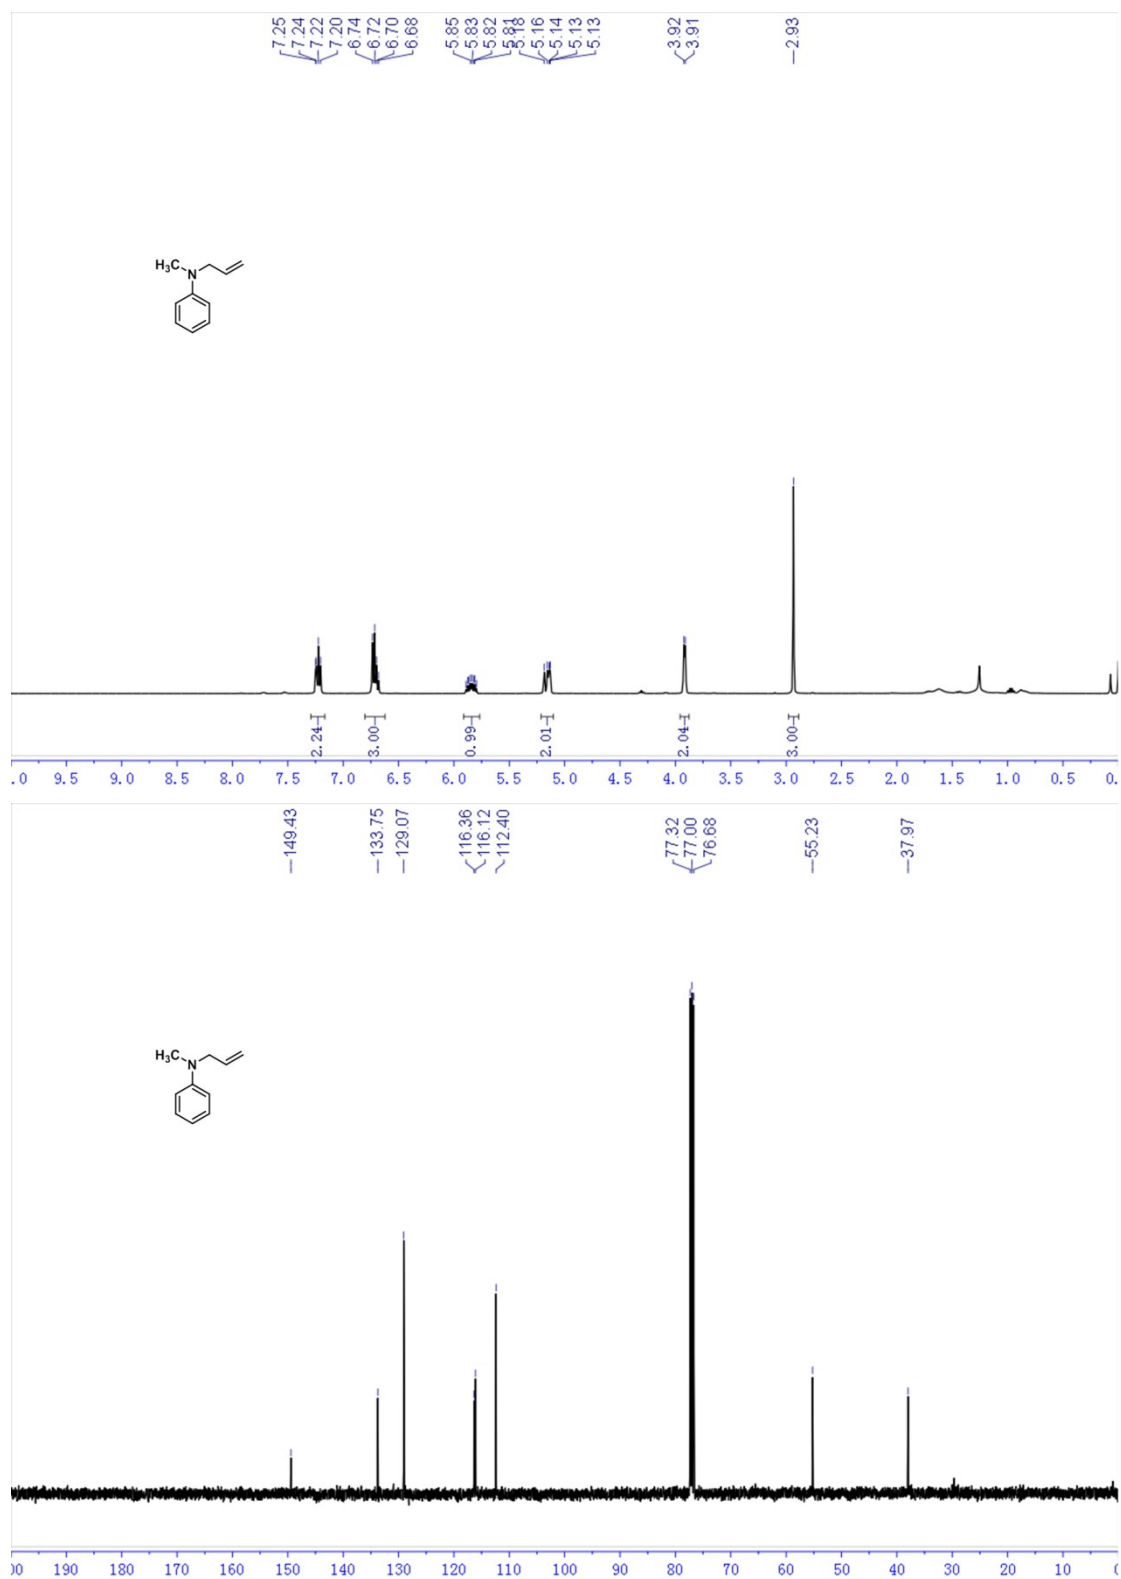

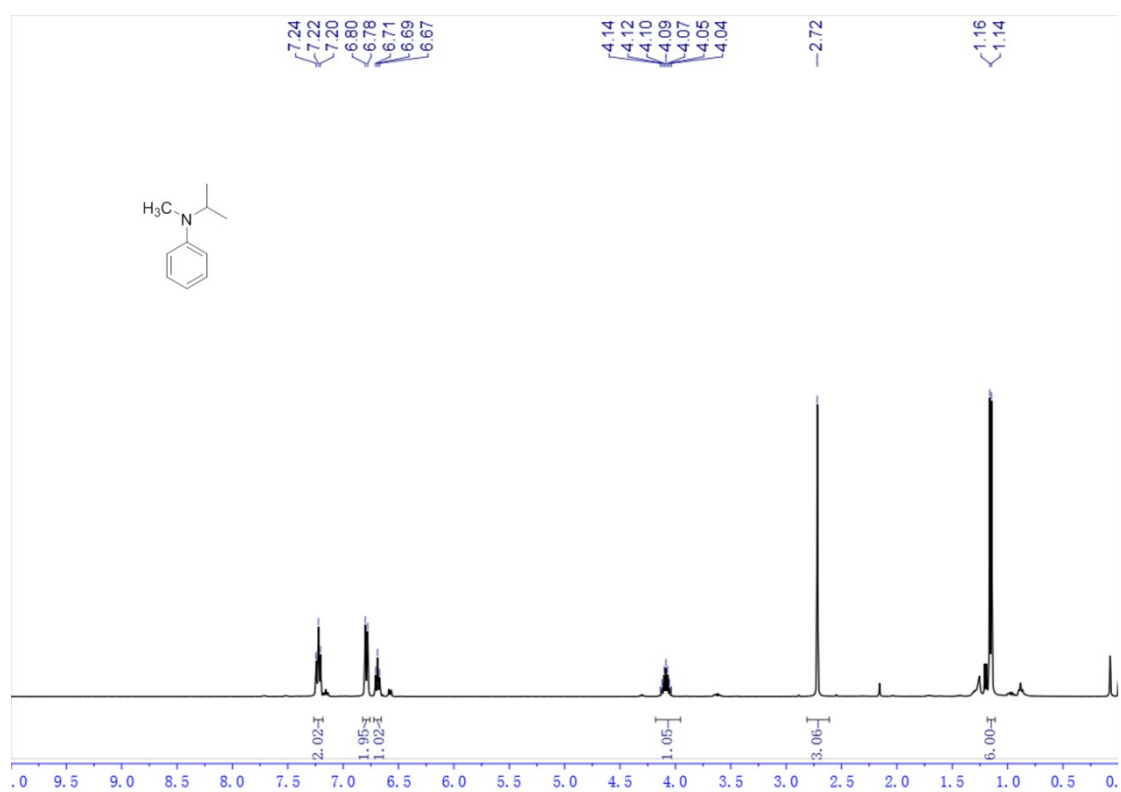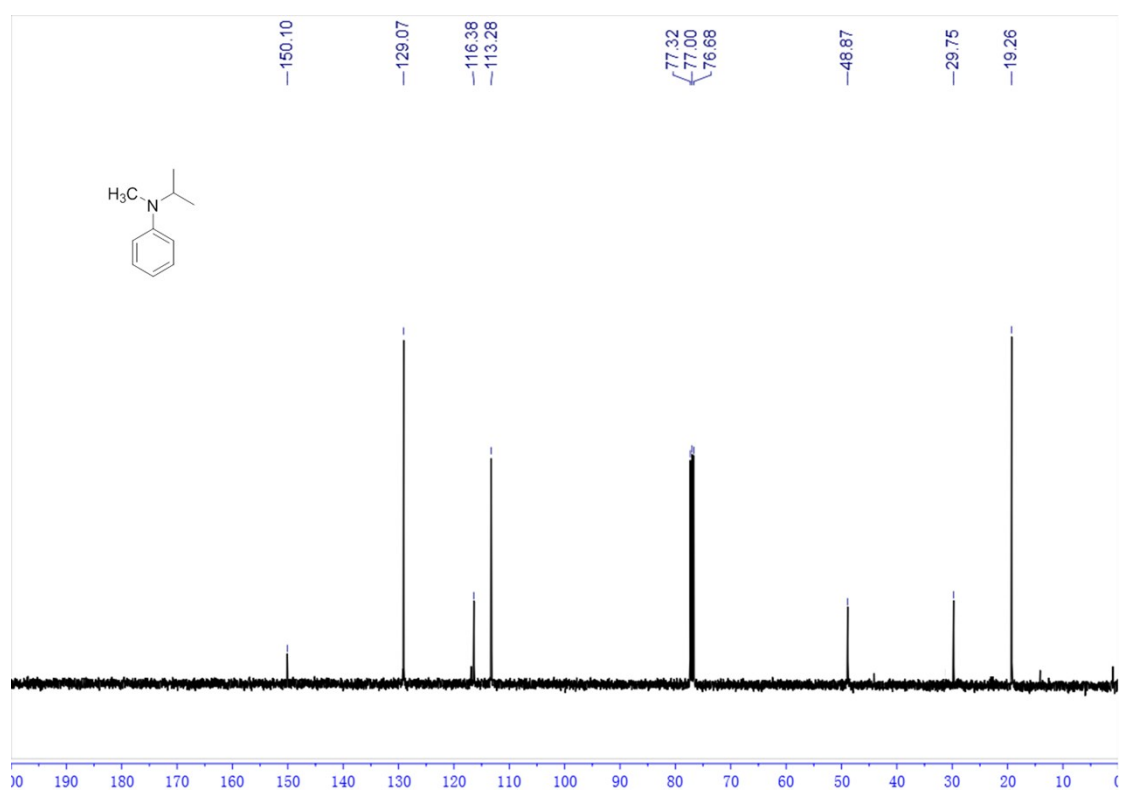



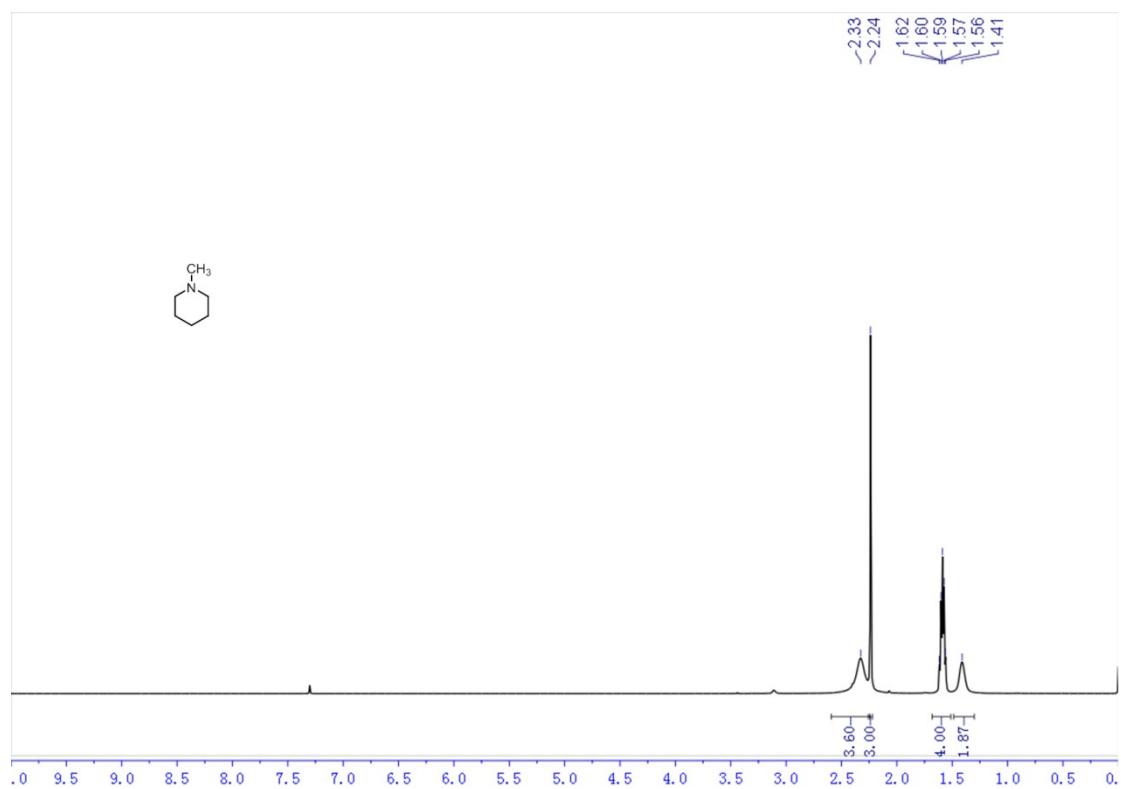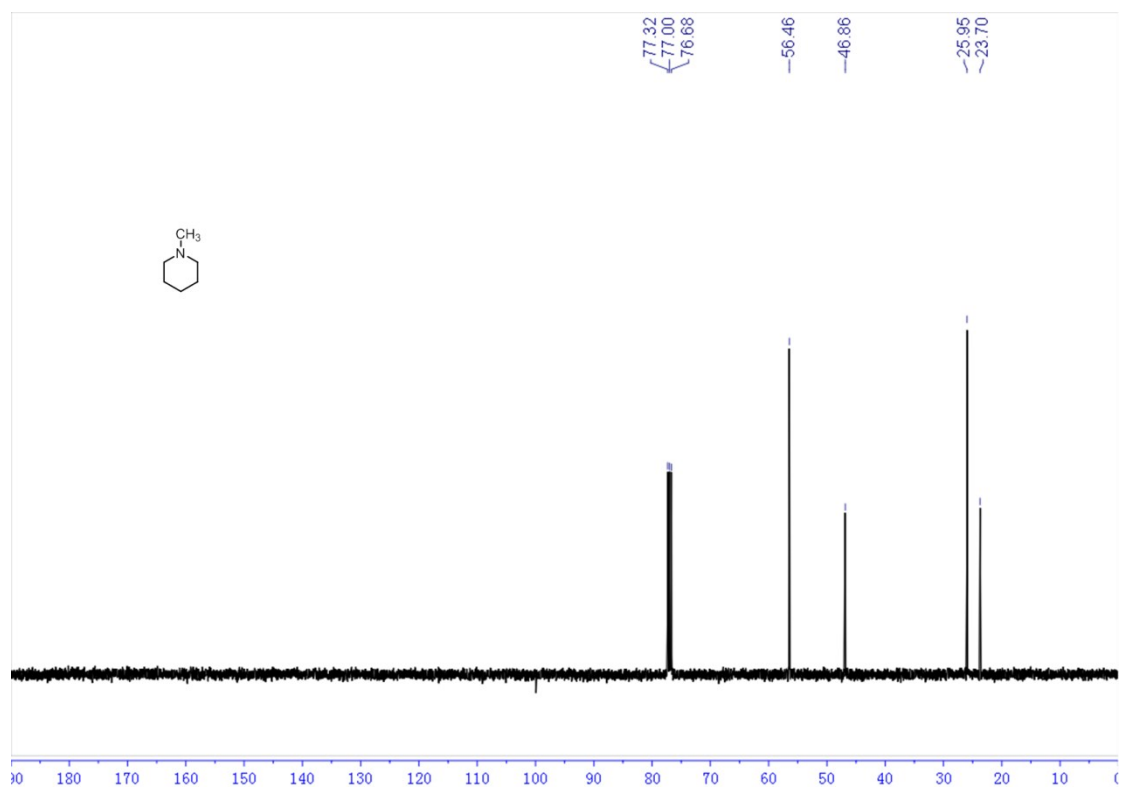

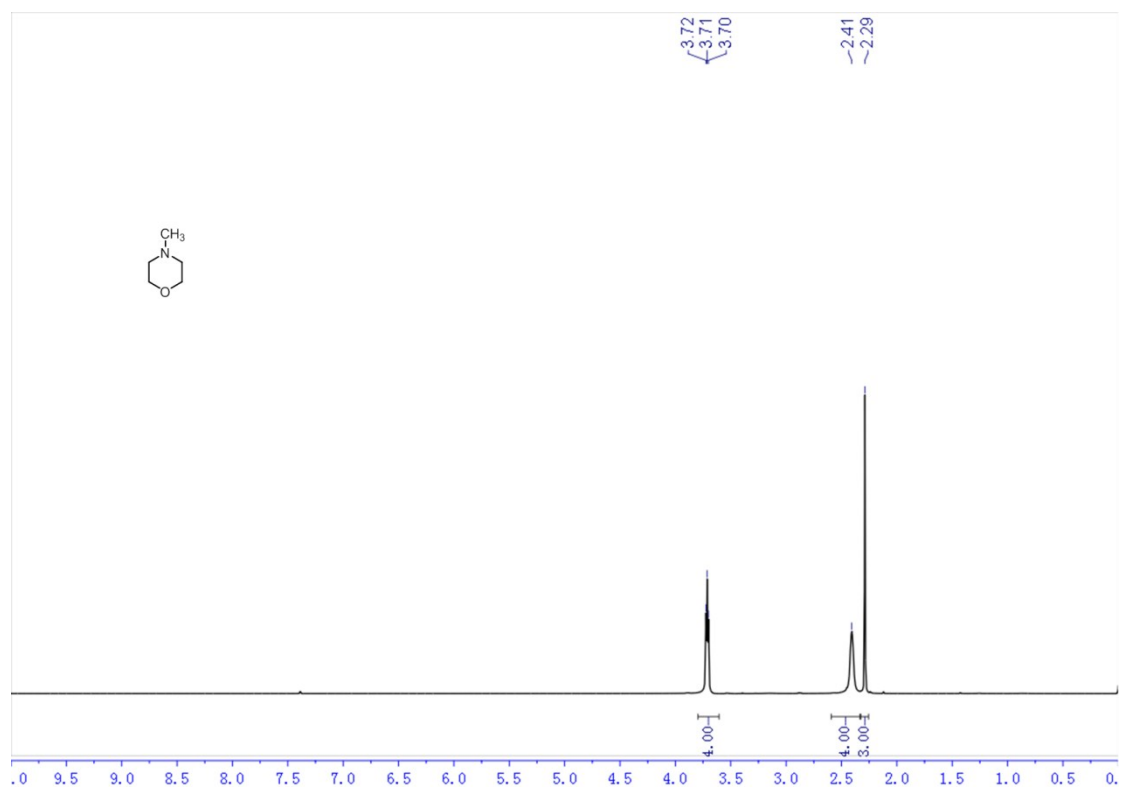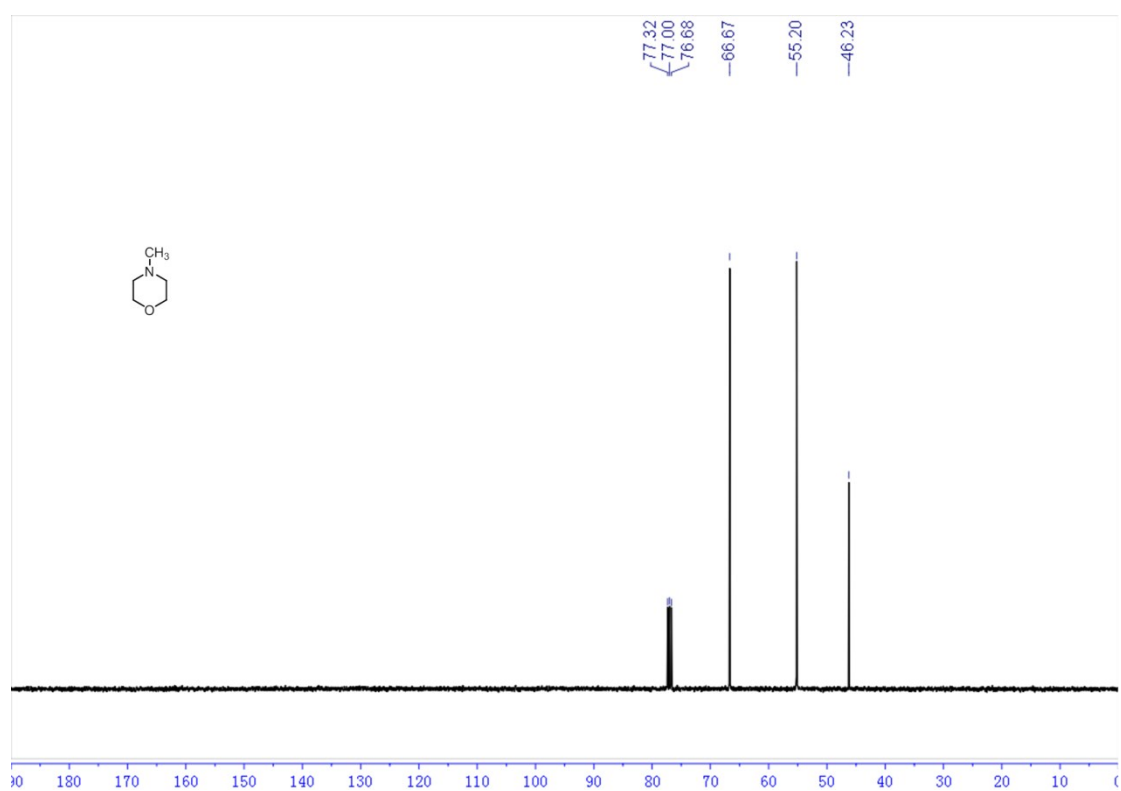

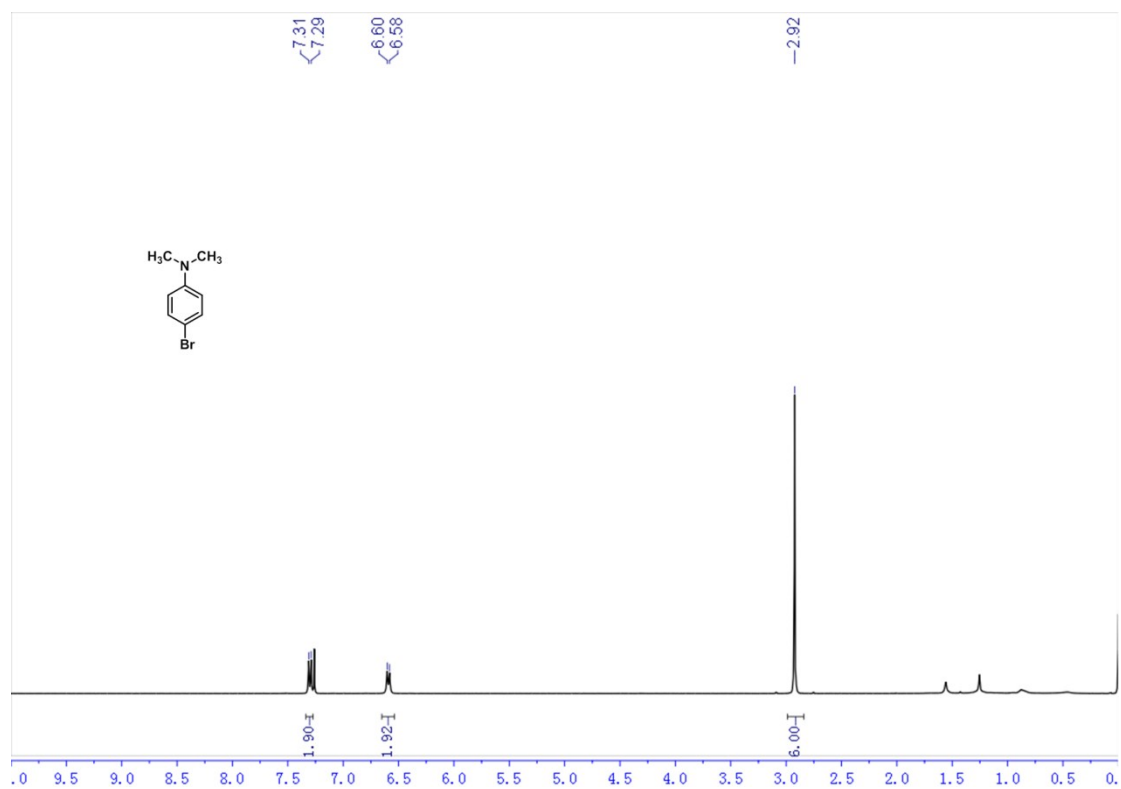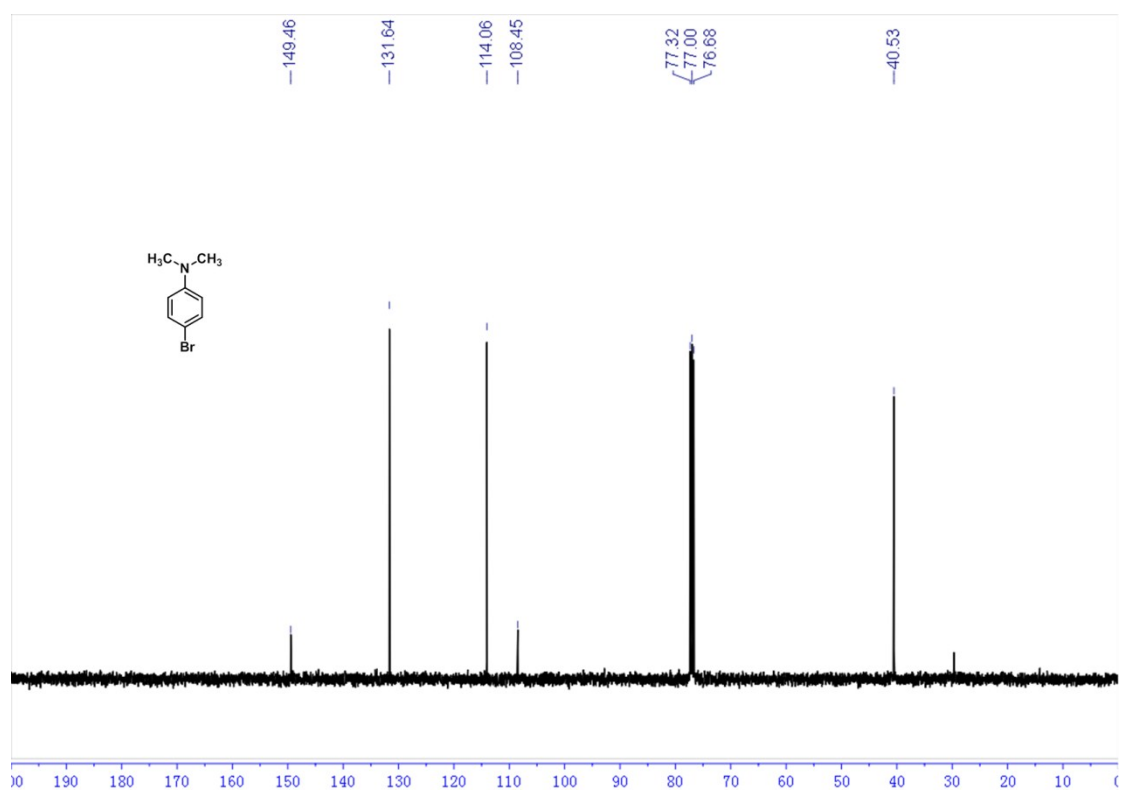

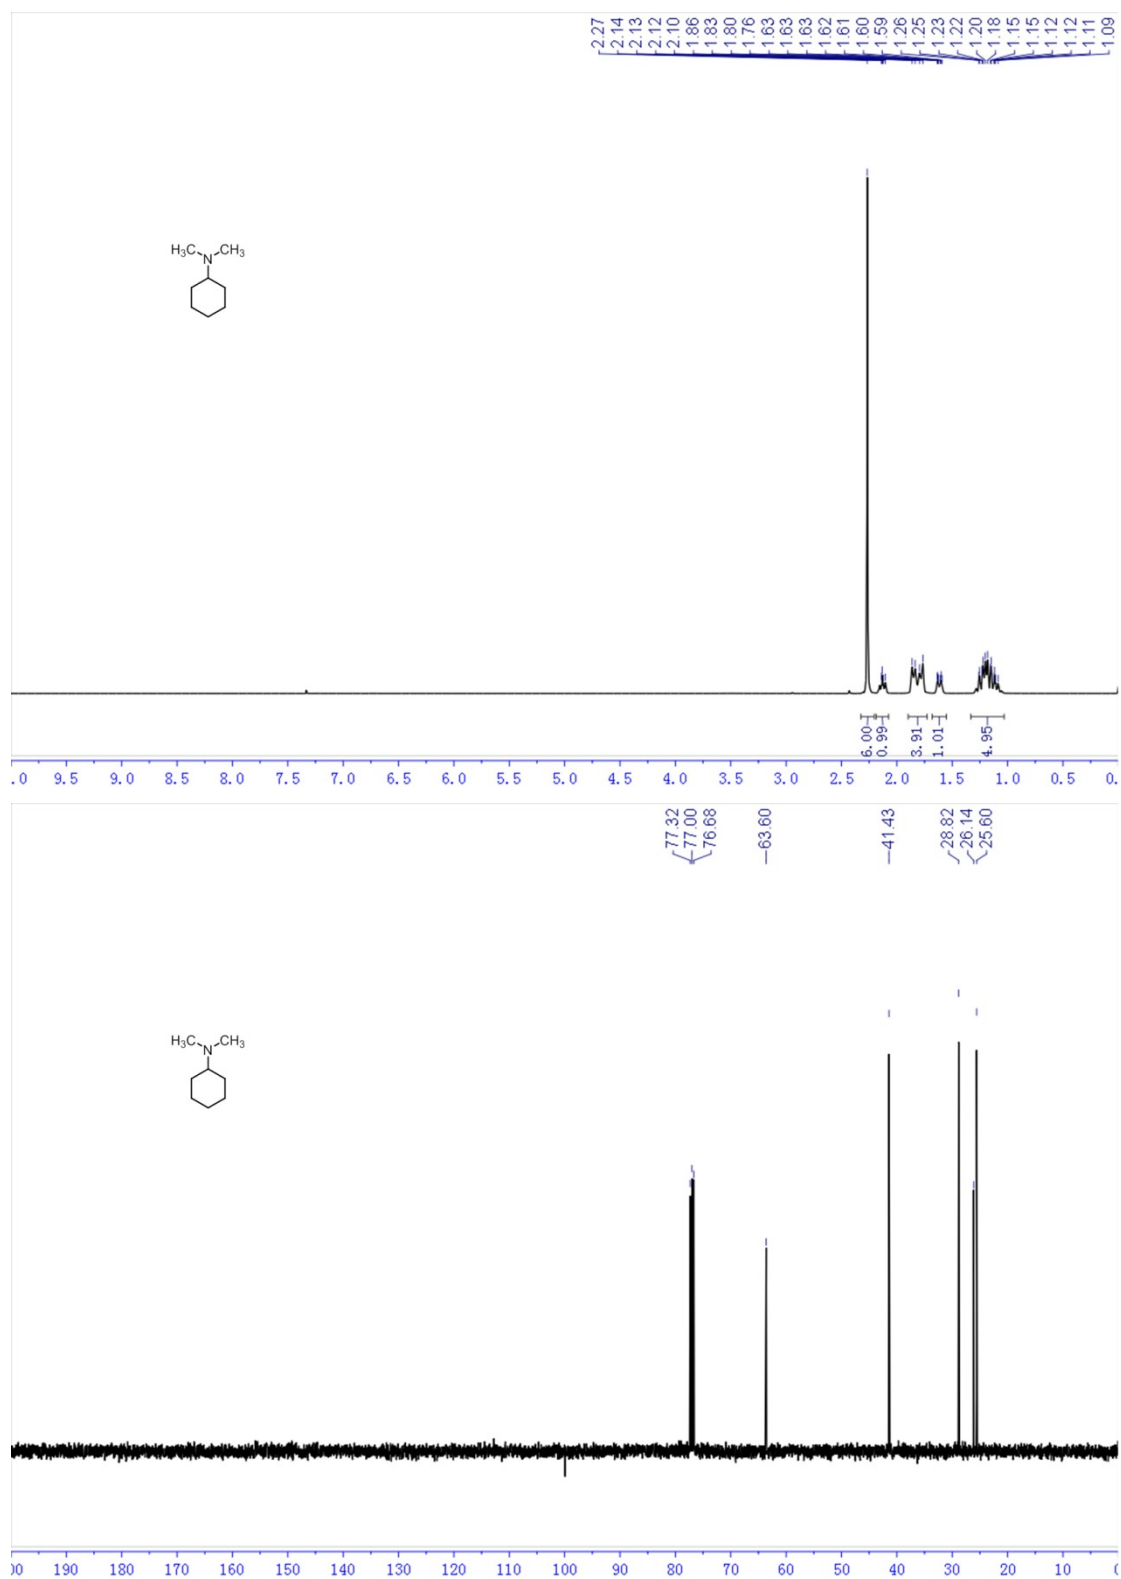

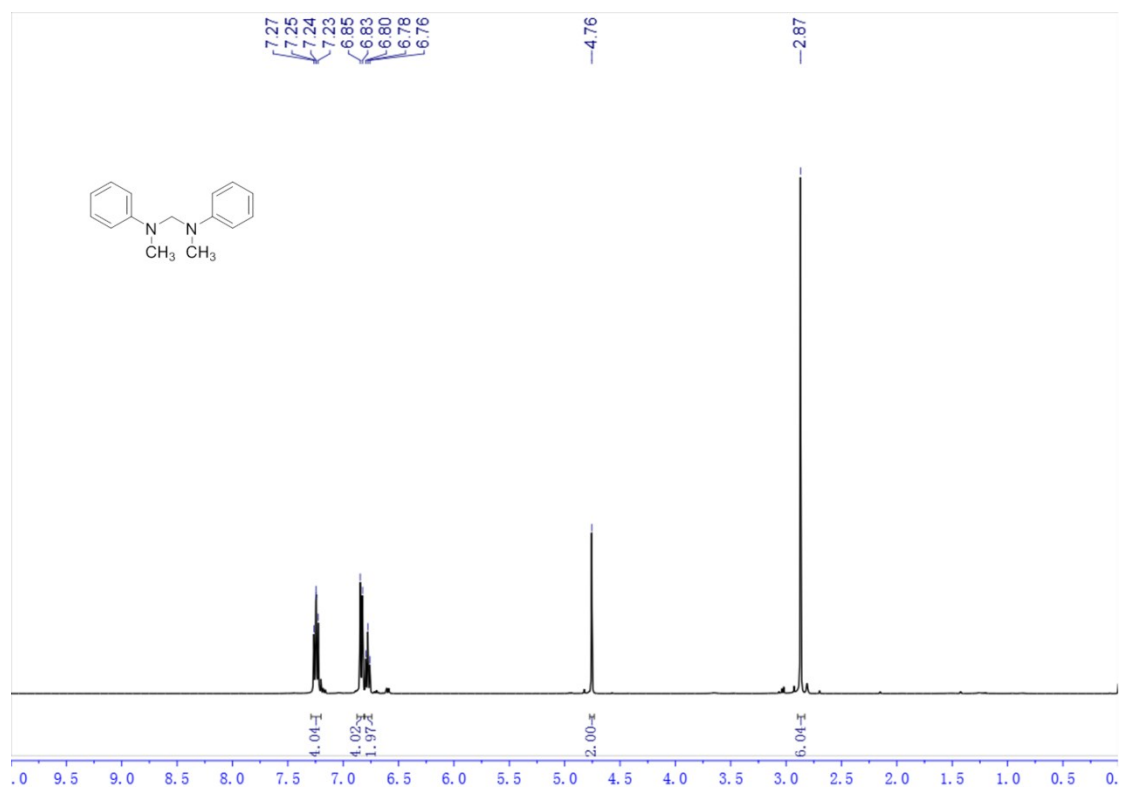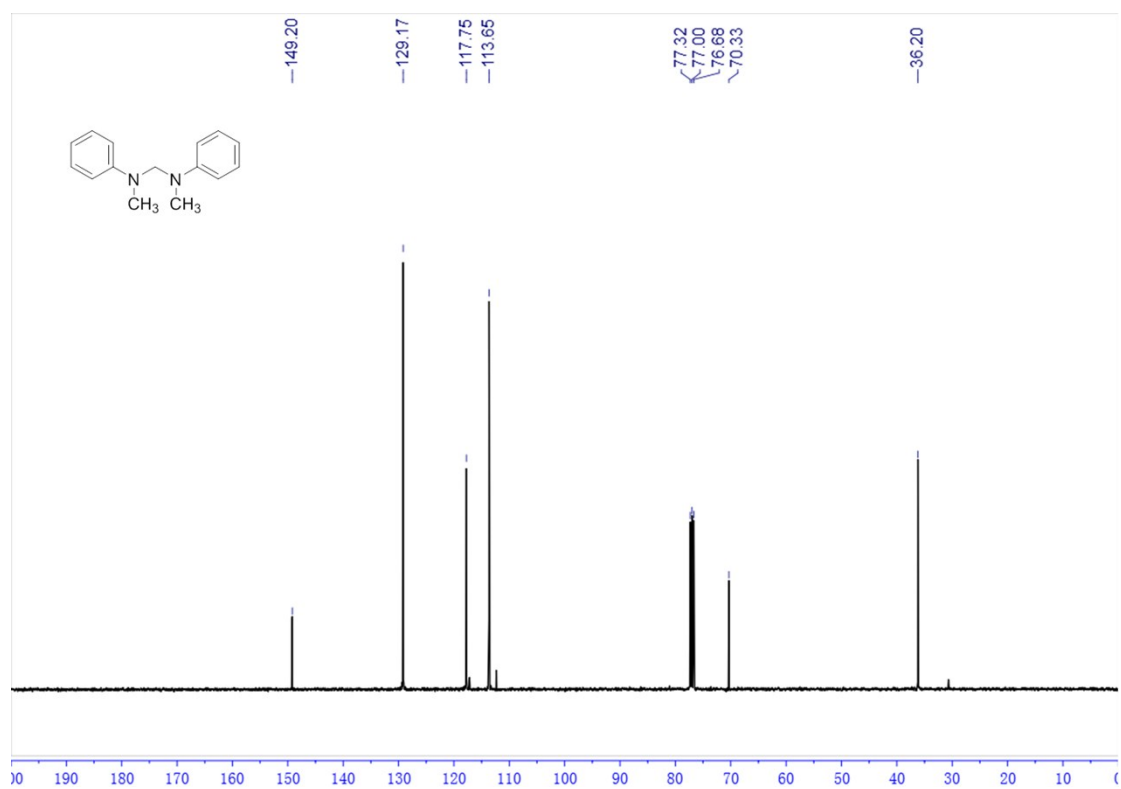

Supplement: c7gc00484b1.pdf [file c7gc00484b1.pdf]
